# Supplementary material for: Inferring predominant pathways in cellular models of breast cancer using limited sample proteomic profiling
Source: BMC Cancer. 2010 Jun 15;10:291. doi: 10.1186/1471-2407-10-291 (PMC2896362; doi:10.1186/1471-2407-10-291)
Supplement: Additional file 2 — Table S1 (Microsoft Excel): List of identified proteins labeled in Figure 1. [file 1471-2407-10-291-S2.XLS]

## Sheet: Sheet1
Serial	Protein		Accession		Molecular		Isoelectric			Aldente	MS-Fit	Mascot
number			number		weight (kD)		point
1	Profilin-1		P07737		15		8.5		Rank	1	1	1
									Score	36.4	488	55
									Cov%	77	44.3	64
2	Aminoacylase-1		Q03154		46		5.7		Rank	1	1	1
									Score	40	821413	71
									Seq.Cov%	41	40.7	49
3	ATP synthase subunit beta, mitochondrial		P06576		56.5		5.2		Rank	1	1	1
									Score	91.8	350000000000	64
									Seq.Cov%	49	54.4	63
4	Heterogeneous nuclear ribonucleoproteins A2/B1		P22626		37.4		8.9		Rank	1	1	1
									Score	109.8	12200000	96
									Seq.Cov%	42	42.2	57
5	Cofilin-1		P23528		18.5		8.2		Rank	1	1	1
									Score	60.9	114250	68
									Seq.Cov%	67	60.2	72
6	Pyrroline-5-carboxylate reductase 1		P32322		33.3		7.2		Rank	1	4	27
									Score	9.17	1260000	30
									Seq.Cov%	46	46.1	62
7	LIM and SH3 domain protein 1		Q14847		29.7		6.6		Rank	1	1	1
									Score	77.8	186924	62
									Seq.Cov%	52	42.5	59
8	Phosphatidylethanolamine-binding protein 1		P30086		21.1		7		Rank	1	1	1
									Score	19.23	1380000	77
									Seq.Cov%	59	58.3	58
9	Calumenin		O43852		37.1		4.4		Rank	1	1	1
									Score	77.8	1610000000	52
									Seq.Cov%	59	55.6	58
10	Cytochrome b-c1 complex subunit 1, mitochondrial		P31930		52.6		5.9		Rank	1	1	1
									Score	43.11	495000000	70
									Seq.Cov%	53	45	59
11	Tubulin beta-2C chain		P68371		49.8		4.8		Rank	1	5	1
									Score	70.9	768000000	66
									Seq.Cov%	58	52.1	60
12	Calcyclin-binding protein		Q9HB71		26.2		8.3		Rank	1	2	9
									Score	22	6666	32
									Seq. Cov%	41	40.4	42
13	UV excision repair protein RAD23 homolog B		P54727		43.2		4.8		Rank	1	1	1
									Score	29.93	134000000	57
									Seq.Cov%	40	39.6	43
14	Calcium-binding mitochondrial carrier protein		Q6NUK1		53.5		6		Rank	1	1	4
									Score	55	3790000	39
									Seq.Cov%	41	45.5	46
15	3-hydroxyisobutyryl-CoA hydrolase, mitochondrial		Q6NVY1		43.8		8.3		Rank	1	1	35
									Score	21.9	12258	28
									Seq.Cov%	32	28.2	33
16	26S protease regulatory subunit 6B		P43686		47.4		5		Rank	1	1	1
									Score	59.2	427000000	70
									Seq.Cov%	49	46.2	57
17	Arfaptin-2		P53365		37.9		5.7		Rank	1	1	9
									Score	34	129363	37
									Seq.Cov%	25	25	27
18	Mitochondrial-processing peptidase subunit beta		O75439		55		6.4		Rank	1	1	1
									Score	55.6	58700000	71
									Seq.Cov.%	41	45.8	56
19	Dihydrolipoyllysine-residue succinyltransferase		AC# P36957		49		9.1		Rank	1	4	31
									Score	2.2	19.7	23
									Seq.Cov%	16	13.7	16
20	NADH dehydrogenase [ubiquinone] 1 alpha subcomplex subunit 5		Q16718		13.5		5.8		Rank	2	1	6
									Score	8.2	3267	32
									Seq.Cov%	47	46.6	55
21	Protein SEC13 homolog		P55735		35.5		5.2		Rank	1	1	4
									Score	7.63	42711	34
									Seq.Cov%	28	27.6	27
22	60S acidic ribosomal protein P0		P05388		34.2		5.7		Rank	1	1	36
									Score	37.9	10200000	28
									Seq. Cov%	43	43.2	36
23	F-actin-capping protein subunit alpha-1		P52907		32.9		5.5		Rank	1	1	1
									Score	41	831000000	60
									Seq.Cov%	68	65.4	74
24	Serine/threonine-protein phosphatase PP1-gamma catalytic subunit		P62136		37.7		6.1		Rank	5	1	1
									Score	7.7	890995	52
									Seq.Cov%	32	34.2	69
25	Fatty acid-binding protein, epidermal		Q01469		15.5		6.6		Rank	1	4	1
									Score	10.1	280	41
									Seq.Cov%	45	37.8	77
26	Actin, cytoplasmic 1		P60709		42		5.3		Rank	1	1	1
									Score	28.1	34857	44
									Seq.Cov.%	43	36.8	45
27	Tubulin alpha-1B chain		P68363		50.1		4.9		Rank	1	1	1
									Score	104.97	188000000000000	90
									Seq.Cov%	58	58.8	63
28	26S protease regulatory subunit 7		P35998		49		5.7		Rank	1	1	1
									Score	272	629000000000	117
									Seq.Cov.%	70	67.4	77
29	Alpha-enolase		P06733		47.4		7		Rank	1	2	1
									Score	18.7	2730000	61
									Seq.Cov.%	44	41	72
30	Glutamate dehydrogenase 1, mitochondrial		P00367		61.4		7.6		Rank	1	1	1
									Score	31.3	1840000000000	70
									Seq.Cov%	55	49.8	58
31	RNA-binding protein 4		Q9BWF3		40.6		6.6		Rank	1	1	1
									Score	39.8	3310000000	79
									Seq.Cov%	57	54.1	71
32	Isocitrate dehydrogenase [NADP] cytoplasmic		O75874		46.9		6.5		Rank	1	2	1
									Score	32.9	37900000	51
									Seq.Cov%	61	54.3	73
33	Heat shock protein beta-1		P04792		22.8		5.9		Rank	1	1	5
									Score	11.2	3563	32
									Seq.Cov%	68	39	39
34	Adenosine kinase		P55263		40.9		6.2		Rank	1	1	2
									Score	21.2	8120000	49
									Seq.Cov%	44	45	64
35	Ethanolamine-phosphate cytidylyltransferase		Q99447		44.2		6.4		Rank	1	1	28
									Score	18	543634	28
									Seq.Cov%	33	33.3	36
36	Triosephosphate isomerase		P60174		27		6.5		Rank	1	1	1
									Score	203	4120000000	153
									Cov%	69	68.3	68
37	SPRY domain-containing protein 4		Q8WW59		23.2		6.4		Rank	1	11	3
									Score	13.7	18191	38
									Cov%	44	39.6	51
38	Guanine nucleotide-binding protein subunit beta-2-like 1		P63244		35		7.6		Rank	1	1	1
									Score	35.8	2380000000	105
									Seq.Cov%	60	58	74
39	3-hydroxyisobutyrate dehydrogenase, mitochondrial		P31937		35.7		8.3		Rank	1	1	2
									Score	5.34	1939	41
									Seq.Cov%	31	28	27
40	Ras-related protein Rab-1B		Q9H0U4		22.1		5.5		Rank	1	1	4
									Score	67.1	9847	39
									Seq.Cov%	52	46.8	51
41	Aspartate aminotransferase, cytoplasmic		P17174		46.4		6.5		Rank	1	1	1
									Score	98.7	1730000000	78
									Seq.Cov%	54	50	53
42	S-phase kinase-associated protein 1		P63208		18.8		4.4		Rank	1	1	2
									Score	6.46	22500	36
									Seq.Cov%	46	41.1	45
43	Elongation factor Ts, mitochondrial		P43897		35.3		8.6		Rank	1	1	14
									Score	4.25	840	25
									Seq.Cov%	20	20	20
44	Alcohol dehydrogenase [NADP+]		P14550		36.9		6.3		Rank	1	1	12
									Score	10.72	11191	27
									Seq.Cov%	32	28.3	28
45	Poly(rC)-binding protein 1		Q15365		37.9		6.6		Rank	1	1	1
									Score	20.8	133789	61
									Seq.Cov%	46	40	68
46	Metalloproteinase inhibitor 2		P16035		25		7.4		Rank	1	1	4
									Score	3.08	176	36
									Seq.Cov%	36	21.4	21
47	Alpha-soluble NSF attachment protein		P54920		33.6		5.2		Rank	1	2	22
									Score	24.54	3260000	30
									Seq.Cov%	48	43.7	65
48	Heterogeneous nuclear ribonucleoprotein H3		P31942		36.9		6.3		Rank	1	2	1
									Score	18	5971	53
									Seq.Cov%	58	49.4	56
49	Purine nucleoside phosphorylase		P00491		32.3		6.4		Rank	1	2	1
									Score	107.8	4436	56
									Cov%	45	42.6	47
50	PDZ and LIM domain protein 1		O00151		36.5		6.5		Rank	1	1	10
									Score	5.6	1830	28
									Seq.Cov%	27	21.6	21
51	Nitrilase homolog 2		Q9NQR4		31		6.8		Rank	1	1	6
									Score	26.8	9760000	37
									Seq.Cov%	50	51.1	75
52	Ras-related protein Rab-11A		P62491		24.5		6.1		Rank	1	1	2
									Score	41.33	19274	34
									Seq.Cov%	32	30.6	45
53	Protein canopy homolog 2		Q9Y2B0		20.9		4.8		Rank	1	1	2
									Score	1.04	88.1	28
									Seq.Cov%	23	21	20
54	Proteasome subunit alpha type-5		P28066		26.5		4.7		Rank	1	1	10
									Score	28.6	14825	31
									Cov%	43	42.7	46
55	Flavin reductase		P30043		22.2		7.1		Rank	1	37	10
									Score	27.4	245	31
									Cov%	36	35.4	48
56	Cleavage stimulation factor 50 kDa subunit		Q05048		49.1		6.1		Rank	1	6	33
									Score	16.3	1340000	29
									Seq.Cov%	36	34.6	45
57	Inorganic pyrophosphatase 2		Q9H2U2		33.1		5.5		Rank	1	1	14
									Score	27.5	1320000	30
									Seq.Cov%	44	35.3	62
58	Phosphoglycerate mutase 1		P18669		28.9		6.6		Rank	1	2	3
									Score	22.2	799000000	43
									Seq.Cov%	77	68.9	83
59	Ribose-phosphate pyrophosphokinase 2		P11908		35.1		6.1		Rank	2	1	2
									Score	63.1	246454	45
									Seq.Cov%	56	39.3	64
60	Thiosulfate sulfurtransferase		Q16762		33.6		6.7		Rank	1	1	21
									Score	30.1	74848	29
									Seq.Cov%	33	33.3	34
61	26S protease regulatory subunit 8		P62195		45.7		7.1		Rank	1	1	10
									Score	29.8	451407	30
									Seq.Cov%	44	40.1	63
62	Guanine nucleotide-binding protein G(I)/G(S)/G(T) subunit beta-2		P62879		38		5.6		Rank	1	1	2
									Score	24.4	323848	50
									Seq.Cov%	36.6	36.2	40
